# Supplementary material for: Metabolome of human gut microbiome is predictive of host dysbiosis
Source: PubMed Central journal article supplement (PMC4570295; doi:10.1186/s13742-015-0084-3), 2015-09-14

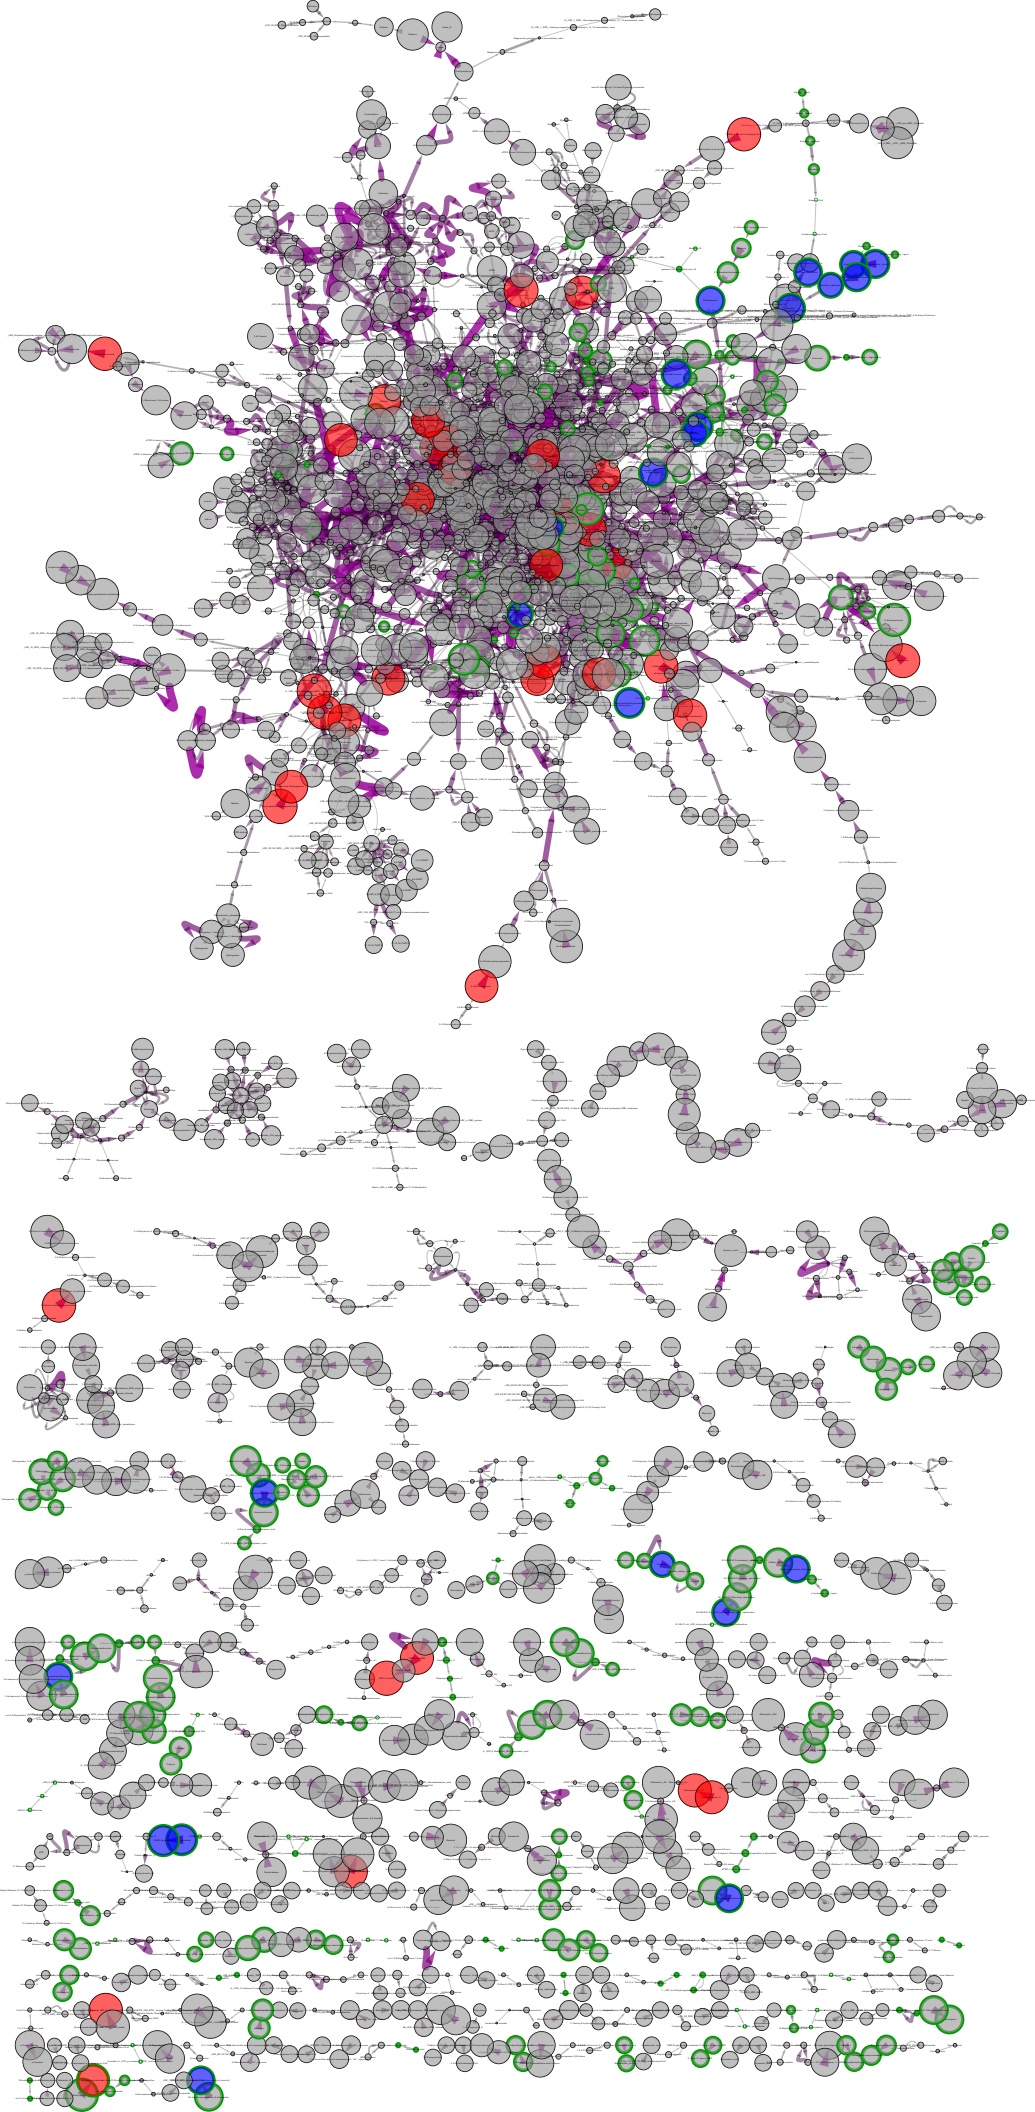

Supplement: 13742_2015_84_MOESM5_ESM.pdf [file 13742_2015_84_MOESM5_ESM.pdf]
